# Supplementary material
Source: ML conference proceedings conference paper supplement (https://proceedings.mlr.press/v31/balasubramanian13a.html)
Supplement: Supplementary file [file balasubramanian13a-supp.pdf]

# Ultrahigh Dimensional Feature Screening via RKHS Embeddings - Supplementary material

This document contains the statement and proof of Lemma 1 which is used to prove Theorem 4.1.

## A Statement and Proof of Lemma 1

**Lemma 1.** *Let  $k_{\mathcal{X}}$  and  $k_{\mathcal{Y}}$  be measurable kernels satisfying assumptions **A1** and **A2**. Then for any  $1 \leq r \leq p_n$ , with probability at least  $1 - \delta$  over the choice of samples,  $\{(x_r^{(i)}, y^{(i)})\}$ ,*

$$|\widehat{\omega}_r - \omega_r| \leq \sqrt{\frac{8U_n(\mathcal{K}; \{(x_r^{(i)}, y^{(i)})\})}{n}} + \sqrt{\frac{8AU_n(\mathcal{K}_{\mathcal{X}}; \{x_r^{(i)}\})}{n}} + \sqrt{\frac{8AU_n(\mathcal{K}_{\mathcal{Y}}; \{y^{(i)}\})}{n}} + \sqrt{\frac{162A^2}{n} \log \frac{6}{\delta}} + \frac{6A}{\sqrt{n}}.$$

*Proof.* The proof technique is similar to that of Theorem 7 in (Sriperumbudur et al., 2009). Consider  $|\widehat{\omega}_r - \omega_r| = |\widehat{\gamma}_r(\mathbb{P}^{X_r Y}, \mathbb{P}^{X_r} \mathbb{P}^Y) - \gamma_r(\mathbb{P}^{X_r Y}, \mathbb{P}^{X_r} \mathbb{P}^Y)| \leq \sup_{k \in \mathcal{K}} \|\mathbb{P}_n^{X_r Y} k - \mathbb{P}^{X_r Y} k\|_{\mathcal{H}} + \sup_{k \in \mathcal{K}} \|\mathbb{P}_n^{X_r} \mathbb{P}^Y k - \mathbb{P}^{X_r} \mathbb{P}^Y k\|_{\mathcal{H}}$ . We now bound the terms  $\theta := \sup_{k \in \mathcal{K}} \|\mathbb{P}_n^{X_r Y} k - \mathbb{P}^{X_r Y} k\|_{\mathcal{H}}$  and  $\phi := \sup_{k \in \mathcal{K}} \|\mathbb{P}_n^{X_r} \mathbb{P}^Y k - \mathbb{P}^{X_r} \mathbb{P}^Y k\|_{\mathcal{H}}$ . Since  $\theta$  satisfies the bounded difference property, using McDiarmid's inequality gives that with probability at least  $1 - \frac{\delta}{6}$  over the choice of  $\{(x_r^{(i)}, y^{(i)})\}_{i=1}^n$ , we have

$$\theta \leq \mathbb{E} \sup_{k \in \mathcal{K}} \|\mathbb{P}_n^{X_r Y} k - \mathbb{P}^{X_r Y} k\|_{\mathcal{H}} + \sqrt{\frac{2A^2}{n} \log \frac{6}{\delta}}. \quad (1)$$

By invoking symmetrization for  $\mathbb{E} \sup_{k \in \mathcal{K}} \|\mathbb{P}_n^{X_r Y} k - \mathbb{P}^{X_r Y} k\|_{\mathcal{H}}$ , we have

$$\mathbb{E} \theta \leq 2\mathbb{E} \mathbb{E}_{\rho} \sup_{k \in \mathcal{K}} \left\| \frac{1}{n} \sum_{i=1}^n \rho_i k(\cdot, (x_r^{(i)}, y^{(i)})) \right\|_{\mathcal{H}}, \quad (2)$$

where  $\{\rho_i\}_{i=1}^n$  represent i.i.d. Rademacher random variables and  $\mathbb{E}_{\rho}$  represents the expectation w.r.t.  $\{\rho_i\}$  conditioned on  $\{(x_r^{(i)}, y^{(i)})\}$ . Since  $\mathbb{E}_{\rho} \sup_{k \in \mathcal{K}} \left\| \frac{1}{n} \sum_{i=1}^n \rho_i k(\cdot, (x_r^{(i)}, y^{(i)})) \right\|_{\mathcal{H}}$  satisfies the bounded difference property, by McDiarmid's inequality, with probability at least  $1 - \frac{\delta}{6}$  over the choice of the random samples of size  $n$ , we have

$$\mathbb{E} \mathbb{E}_{\rho} \sup_{k \in \mathcal{K}} \left\| \frac{1}{n} \sum_{i=1}^n \rho_i k(\cdot, (x_r^{(i)}, y^{(i)})) \right\|_{\mathcal{H}} \leq \sqrt{\frac{2A^2}{n} \log \frac{6}{\delta}} + \mathbb{E}_{\rho} \sup_{k \in \mathcal{K}} \left\| \frac{1}{n} \sum_{i=1}^n \rho_i k(\cdot, (x_r^{(i)}, y^{(i)})) \right\|_{\mathcal{H}}. \quad (3)$$

By writing

$$\left\| \frac{1}{n} \sum_{i=1}^n \rho_i k(\cdot, (x_r^{(i)}, y^{(i)})) \right\|_{\mathcal{H}} \leq \frac{A}{\sqrt{n}} + \frac{\sqrt{2}}{n} \sqrt{\left| \sum_{i < j} \rho_i \rho_j k((x_r^{(i)}, y^{(i)}), (x_r^{(j)}, y^{(j)})) \right|} \quad (4)$$

we have with probability at least  $1 - \frac{\delta}{6}$ , the following holds:

$$\mathbb{E} \mathbb{E}_{\rho} \sup_{k \in \mathcal{K}} \left\| \frac{1}{n} \sum_{i=1}^n \rho_i k(\cdot, (x_r^{(i)}, y^{(i)})) \right\|_{\mathcal{H}} \leq \sqrt{\frac{2A^2}{n} \log \frac{6}{\delta}} + \frac{A}{\sqrt{n}} + \sqrt{\frac{2U_n(\mathcal{K}; \{(x_r^{(i)}, y^{(i)})\})}{n}}. \quad (5)$$

Tying (1)-(5), we have that w.p. at least  $1 - \frac{\delta}{3}$  over the choice of  $\{(x_r^{(i)}, y^{(i)})\}$ , the following holds:

$$\theta \leq \sqrt{\frac{8U_n(\mathcal{K}; \{(x_r^{(i)}, y^{(i)})\})}{n}} + \frac{2A}{\sqrt{n}} + \sqrt{\frac{18A^2}{n} \log \frac{6}{\delta}}. \quad (6)$$

Now we consider bounding  $\phi$

$$\begin{aligned}
\phi &\stackrel{\text{def}}{=} \sup_{k \in \mathcal{K}} \|\mathbb{P}_n^{X_r} \mathbb{P}_n^Y k - \mathbb{P}^{X_r} \mathbb{P}^Y k\|_{\mathcal{H}} \\
&= \sup_{k \in \mathcal{K}} \left\| \int k_{\mathcal{X}}(\cdot, x) k_{\mathcal{Y}}(\cdot, y) d[(\mathbb{P}^{X_r} \times \mathbb{P}^Y) - (\mathbb{P}_n^{X_r} \times \mathbb{P}_n^Y)](x, y) \right\|_{\mathcal{H}} \\
&= \sup_{k \in \mathcal{K}} \left\| \int k_{\mathcal{X}}(\cdot, x) d\mathbb{P}^{X_r}(x) \int k_{\mathcal{Y}}(\cdot, y) d\mathbb{P}^Y(y) - \int k_{\mathcal{X}}(\cdot, x) d\mathbb{P}_n^{X_r}(x) \int k_{\mathcal{Y}}(\cdot, y) d\mathbb{P}_n^Y(y) \right\|_{\mathcal{H}} \\
&\leq \sup_{k \in \mathcal{K}} \left\| \int k_{\mathcal{X}}(\cdot, x) d(\mathbb{P}^{X_r} - \mathbb{P}_n^{X_r})(x) \int k_{\mathcal{Y}}(\cdot, y) d\mathbb{P}^Y(y) \right\|_{\mathcal{H}} \\
&\quad + \sup_{k \in \mathcal{K}} \left\| \int k_{\mathcal{X}}(\cdot, x) d\mathbb{P}_n^{X_r}(x) \int k_{\mathcal{Y}}(\cdot, y) d(\mathbb{P}^Y - \mathbb{P}_n^Y)(y) \right\|_{\mathcal{H}} \\
&= \sup_{k \in \mathcal{K}} \left\| \int k_{\mathcal{X}}(\cdot, x) d(\mathbb{P}^{X_r} - \mathbb{P}_n^{X_r})(x) \right\|_{\mathcal{H}_X} \left\| \int k_{\mathcal{Y}}(\cdot, y) d\mathbb{P}^Y(y) \right\|_{\mathcal{H}_Y} \\
&\quad + \sup_{k \in \mathcal{K}} \left\| \int k_{\mathcal{X}}(\cdot, x) d\mathbb{P}_n^{X_r}(x) \right\|_{\mathcal{H}_X} \left\| \int k_{\mathcal{Y}}(\cdot, y) d(\mathbb{P}^Y - \mathbb{P}_n^Y)(y) \right\|_{\mathcal{H}_Y} \\
&= \sup_{k_{\mathcal{X}} \in \mathcal{K}_X} \left\| \int k_{\mathcal{X}}(\cdot, x) d(\mathbb{P}^{X_r} - \mathbb{P}_n^{X_r})(x) \right\|_{\mathcal{H}_X} \sup_{k_{\mathcal{Y}} \in \mathcal{K}_Y} \left\| \int k_{\mathcal{Y}}(\cdot, y) d\mathbb{P}^Y(y) \right\|_{\mathcal{H}_Y} \\
&\quad + \sup_{k_{\mathcal{Y}} \in \mathcal{K}_Y} \left\| \int k_{\mathcal{Y}}(\cdot, y) d(\mathbb{P}^Y - \mathbb{P}_n^Y)(y) \right\|_{\mathcal{H}_Y} \sup_{k_{\mathcal{X}} \in \mathcal{K}_X} \left\| \int k_{\mathcal{X}}(\cdot, x) d\mathbb{P}_n^{X_r}(x) \right\|_{\mathcal{H}_X} \\
&\leq \sqrt{A} \sup_{k_{\mathcal{X}} \in \mathcal{K}_X} \left\| \int k_{\mathcal{X}}(\cdot, x) d(\mathbb{P}^{X_r} - \mathbb{P}_n^{X_r})(x) \right\|_{\mathcal{H}_X} + \sqrt{A} \sup_{k_{\mathcal{Y}} \in \mathcal{K}_Y} \left\| \int k_{\mathcal{Y}}(\cdot, y) d(\mathbb{P}^Y - \mathbb{P}_n^Y)(y) \right\|_{\mathcal{H}_Y}.
\end{aligned}$$

Now,  $\phi_{\mathcal{X}} \stackrel{\text{def}}{=} \sup_{k_{\mathcal{X}} \in \mathcal{K}_X} \left\| \int k_{\mathcal{X}}(\cdot, x) d(\mathbb{P}^{X_r} - \mathbb{P}_n^{X_r})(x) \right\|_{\mathcal{H}_X}$  and  $\phi_{\mathcal{Y}} \stackrel{\text{def}}{=} \sup_{k_{\mathcal{Y}} \in \mathcal{K}_Y} \left\| \int k_{\mathcal{Y}}(\cdot, y) d(\mathbb{P}^Y - \mathbb{P}_n^Y)(y) \right\|_{\mathcal{H}_Y}$  can be bounded by using Theorem 7 of (Sriperumbudur et al., 2009), which yields that probability at least  $1 - \frac{\delta}{3}$

$$\phi_{\mathcal{X}} \leq \sqrt{\frac{8U_n(\mathcal{K}_X; \{x_r^{(i)}\})}{n}} + \frac{2\sqrt{A}}{\sqrt{n}} + \sqrt{\frac{18A}{n} \log \frac{6}{\delta}} \quad (7)$$

and

$$\phi_{\mathcal{Y}} \leq \sqrt{\frac{8U_n(\mathcal{K}_Y; \{y^{(i)}\})}{n}} + \frac{2\sqrt{A}}{\sqrt{n}} + \sqrt{\frac{18A}{n} \log \frac{6}{\delta}}. \quad (8)$$

Using (7) and (8), with probability at least  $1 - \frac{2\delta}{3}$  over the choice of  $\{x_r^{(i)}\}$  and  $\{y^{(i)}\}$ , we have

$$\phi \leq \sqrt{\frac{8AU_n(\mathcal{K}_Y; \{y^{(i)}\})}{n}} + \frac{4A}{\sqrt{n}} + \sqrt{\frac{72A^2}{n} \log \frac{6}{\delta}} + \sqrt{\frac{8AU_n(\mathcal{K}_X; \{x_r^{(i)}\})}{n}}. \quad (9)$$

Combining (6) and (9) provides the result.  $\square$

## References

Sriperumbudur, B., Fukumizu, K., Gretton, A., Lanckriet, G., and Schölkopf, B. (2009). Kernel choice and classifiability for RKHS embeddings of probability distributions. In *Advances in Neural Information Processing Systems 22*, pages 1750–1758. MIT Press.
